# Supplementary material for: Children and Adults in a Household Cohort Study Have Robust Longitudinal Immune Responses Following SARS-CoV-2 Infection or Exposure
Source: Front Immunol. 2021 Oct 13;12:741639. doi: 10.3389/fimmu.2021.741639 (PMC8548628; doi:10.3389/fimmu.2021.741639)
Supplement: Supplementary file 2 [file Table_1.xlsx]

## Sheet: Complete Cohort
Adult or Child	SARS-CoV-2	T1 or T2	Date of sample	Blood collection time	Processing start time	Age at sample collection	Day of sample collection since first PCR test	Sex	symptomatic/ asymptomatic	SARS-CoV-2 swab	PCR platform	CT score at diagnosis	Other respiratory pathogen result
A	1	T1	2020-05-12	09:30:00	09:50:00	42	4	F	symptomatic	Positive	LC-480	32.35	negative
A	1	T1	2020-05-28	10:50:00	12:00:00	27	9	F	asymptomatic	Positive	-	-	not done
A	1	T1	2020-06-18	08:15:00	11:25:00	33	4	M	symptomatic	Positive	LC-480	20.47	not done
A	1	T1	2020-06-18	08:00:00	11:25:00	29		F	symptomatic	Positive	-	-	not done
A	1	T1	2020-07-08	08:30:00	09:48:00	35	9	M	symptomatic	Positive	-	-	negative
A	1	T1	2020-07-08	08:30:00	09:48:00	35	9	F	symptomatic	Positive	-	-	negative
A	1	T1	2020-07-15	08:00:00	09:50:00	62	16	M	symptomatic	Positive	LC-480	19.84	negative
A	1	T1	2020-07-15	08:00:00	09:50:00	62	12	F	symptomatic	Positive	-	-	negative
A	1	T1	2020-07-23	08:00:00	10:15:00	35	11	M	asymptomatic	Positive	LC-480	27.97	negative
A	1	T1	2020-07-31	08:00:00	10:30:00	40	12	M	symptomatic	Positive	LC-480	26.75	negative
A	1	T1	2020-08-12	08:15:00	09:15:00	36	14	M	symptomatic	Positive	-	-	negative
A	1	T1	2020-08-12	08:30:00	09:15:00	35	11	F	symptomatic	Positive	LC-480	33.87	negative
A	1	T1	2020-08-20	08:10:00	10:30:00	51	13	M	symptomatic	Positive	-	-	negative
A	1	T1	2020-08-20	09:10:00	10:15:00	32	18	M	symptomatic	Positive	-	-	negative
A	1	T1	2020-08-21	08:00:00	09:35:00	19	7	F	symptomatic	Positive	LC-480	33.08	negative
A	1	T2	2020-05-01	11:00:00	11:25:00	20		F	symptomatic	Positive	-	-	not done
A	1	T2	2020-06-03	08:30:00	09:00:00	42	26	F	symptomatic	Positive	LC-480	32.35	negative
A	1	T2	2020-07-08	15:00:00	15:20:00	27	50	F	asymptomatic	Positive	-		Enterovirus
A	1	T2	2020-07-03	13:23:00	13:45:00	43	41	F	symptomatic	Positive	-		rhino/enterovirus
A	1	T2	2020-08-20	09:42:00	13:00:00	36	52	F	symptomatic	Positive	-	-	negative
A	1	T2	2020-07-31	12:09:00	12:30:00	62	32	M	symptomatic	Positive	LC-480	19.84	negative
A	1	T2	2020-07-31	11:02:00	12:30:00	62	28	F	symptomatic	Positive	-	-	negative
A	1	T2	2020-09-01	09:35:00	11:25:00	40	44	M	symptomatic	Positive	LC-480	26.75	negative
A	1	T2	2020-07-29	14:51:00	15:15:00	38	31	F	symptomatic	Positive	LC-480	36	not done
A	1	T2	2020-09-07	12:23:00	15:00:00	35	42	M	symptomatic	Positive	LC-480	23.71	negative
A	1	T2	2020-09-07	12:23:00	15:00:00	32	45	F	symptomatic	Positive	-	-	negative
A	1	T2	2020-09-10	10:07:00	12:30:00	36	43	M	symptomatic	Positive	-	-	negative
A	1	T2	2020-09-10	10:27:00	12:30:00	35	40	F	symptomatic	Positive	LC-480	33.87	negative
A	1	T2	2020-09-15	10:55:00	12:52:00	51	39	M	symptomatic	Positive	-	-	negative
A	1	T2	2020-09-22	14:05:00	16:05:00	32	51	M	symptomatic	Positive	-	-	negative
A	0	T1	2020-05-10	11:00:00	11:40:00	43	0	M	asymptomatic	Negative			RSV-B
A	0	T1	2020-06-11	13:40:00	15:05:00	42	1	M	asymptomatic	Negative			rhino/entero
A	0	T1	2020-06-11	14:00:00	15:05:00	41	1	F	asymptomatic	Negative			negative
A	0	T1	2020-06-18	08:40:00	11:25:00	46	0	M	asymptomatic	Negative			rhino/entero
A	0	T1	2020-06-18	08:50:00	11:25:00	41	0	F	asymptomatic	Negative			rhino/entero
A	0	T1	2020-06-25	10:45:00	12:10:00	38	8	F	symptomatic	Negative			rhino/entero and adeno
A	0	T1	2020-06-25	10:30:00	12:10:00	37	9	M	symptomatic	Negative			rhino/entero
A	0	T1	2020-06-25	08:00:00	10:00:00	37	3	F	asymptomatic	Negative			rhino/entero
A	0	T1	2020-07-01	08:30:00	09:10:00	50	10	F	symptomatic	Negative			Enterovirus
A	0	T1	2020-07-17	08:00:00	10:10:00	37	7	M	asymptomatic	Negative			negative
A	0	T1	2020-07-17	08:20:00	10:10:00	35	7	F	asymptomatic	Negative			Enterovirus
A	0	T1	2020-07-16	13:10:00	14:00:00	38	0	M	asymptomatic	Negative			negative
A	0	T1	2020-07-16	13:00:00	14:00:00	37	3	F	symptomatic	Negative			not done
A	0	T1	2020-07-23	08:10:00	10:15:00	35	11	F	asymptomatic	Negative			negative
A	0	T1	2020-07-24	08:30:00	10:00:00	35	3	M	asymptomatic	Negative			negative
A	0	T1	2020-07-24	08:45:00	10:00:00	34	3	F	asymptomatic	Negative			negative
A	0	T1	2020-07-31	08:20:00	10:30:00	39	12	F	symptomatic	Negative			negative
A	0	T1	2020-08-20	08:00:00	10:30:00	52	13	F	symptomatic	Negative			negative
A	0	T1	2020-08-20	08:20:00	10:30:00	25	13	M	symptomatic	Negative			negative
A	0	T1	2020-08-20	09:00:00	10:15:00	26	15	F	asymptomatic	Negative			negative
A	0	T1	2020-08-21	08:20:00	09:35:00	56	4	F	symptomatic	Negative			negative
A	0	T1	2020-08-21	07:45:00	09:35:00	52	5	M	asymptomatic	Negative			negative
A	0	T1	2020-08-21	08:10:00	09:35:00	21	4	M	asymptomatic	Negative			negative
A	0	T1	2020-09-04	08:30:00	09:45:00	38	7	F	symptomatic	Negative			negative
A	0	T2	2020-05-01	10:45:00	11:25:00	51		M	symptomatic	Negative			not done
A	0	T2	2020-05-01	11:10:00	11:25:00	47		F	symptomatic	Negative			not done
A	0	T2	2020-05-01	10:55:00	11:25:00	22		M	symptomatic	Negative			not done
A	0	T2	2020-06-16	17:07:00	17:16:00	43	37	M	asymptomatic	Negative			RSV-B
A	0	T2	2020-07-03	13:15:00	13:45:00	44		M	asymptomatic	Negative			not done
A	0	T2	2020-07-15	13:55:00	14:45:00	42	34	M	asymptomatic	Negative			rhino/entero
A	0	T2	2020-07-16	14:05:00	14:45:00	42	35	F	asymptomatic	Negative			negative
A	0	T2	2020-07-16	08:50:00	09:19:00	46	28	M	asymptomatic	Negative			rhino/entero
A	0	T2	2020-07-15	14:10:00	14:45:00	41	27	F	asymptomatic	Negative			rhino/entero
A	0	T2	2020-08-21	12:48:00	13:30:00	38	65	F	symptomatic	Negative			rhino/entero and adeno
A	0	T2	2020-08-21	12:42:00	13:30:00	37	65	M	symptomatic	Negative			rhino/entero
A	0	T2	2020-07-24	11:54:00	12:30:00	38	29	F	asymptomatic	Negative			rhino/entero
A	0	T2	2020-07-24	11:50:00	12:30:00	40	29	M	asymptomatic	Negative			rhino/entero
A	0	T2	2020-07-22	13:56:00	14:20:00	50	31	F	symptomatic	Negative			Enterovirus
A	0	T2	2020-07-30	15:20:00	16:00:00	43	32	M	asymptomatic	Negative			adenovirus
A	0	T2	2020-07-30	15:26:00	16:00:00	43	32	F	asymptomatic	Negative			not done
A	0	T2	2020-07-28	11:15:00	11:30:00	43	31	M	symptomatic	Negative			negative
A	0	T2	2020-07-28	11:10:00	11:30:00	29	31	F	symptomatic	Negative			negative
A	0	T2	2020-08-10	09:23:00	10:45:00	58	41	F	symptomatic	Negative			negative
A	0	T2	2020-08-10	09:27:00	09:45:00	57	40	M	symptomatic	Negative			Enterovirus
A	0	T2	2020-08-14	11:55:00	12:40:00	38	29	M	asymptomatic	Negative			negative
A	0	T2	2020-08-14	12:12:00	12:40:00	37	32	F	symptomatic	Negative			not done
A	0	T2	2020-09-01	09:41:00	11:25:00	39	44	F	symptomatic	Negative			negative
A	0	T2	2020-07-29	14:59:00	15:15:00	39	31	M	symptomatic	Negative			not done
A	0	T2	2020-07-29	15:20:00	16:05:00	33	28	M	symptomatic	Negative			not done
A	0	T2	2020-07-29	15:14:00	16:05:00	30	28	F	asymptomatic	Negative			not done
A	0	T2	2020-09-10	13:20:00	14:20:00	42	41	F	asymptomatic	Negative			negative
A	0	T2	2020-09-10	13:30:00	14:20:00	40	41	M	asymptomatic	Negative			negative
A	0	T2	2020-09-15	10:40:00	12:52:00	52	39	F	symptomatic	Negative			negative
A	0	T2	2020-09-15	10:50:00	12:52:00	26	39	M	symptomatic	Negative			negative
A	0	T2	2020-09-22	13:45:00	16:05:00	26	48	F	asymptomatic	Negative			negative
A	0	T2	2020-09-28	11:20:00	12:00:00	38	31	F	symptomatic	Negative			negative
C	1	T1	2020-06-11	13:30:00	15:05:00	2	3	M	symptomatic	Positive	LC-480		rhino/enterovirus
C	1	T1	2020-06-18	08:30:00	11:25:00	10	3	F	symptomatic	Positive	LC-480	33.13	rhino/entero
C	1	T1	2020-06-25	11:00:00	12:10:00	1	10	M	symptomatic	Positive	LC-480	30.37	rhino/entero
C	1	T1	2020-07-01	08:40:00	09:10:00	11	10	F	symptomatic	Positive	LC-480	32.19	negative
C	1	T1	2020-07-08	09:00:00	09:48:00	5	10	F	symptomatic	Positive	-	-	negative
C	1	T1	2020-07-08	09:20:00	09:48:00	2	7	F	asymptomatic	Positive	LC-480	20.54	Enterovirus, Adenovirus
C	1	T1	2020-07-17	08:40:00	10:10:00	2	5	M	symptomatic	Positive	LC-480		negative
C	1	T1	2020-07-24	09:00:00	10:00:00	1	8	M	symptomatic	Positive	LC-480	32.91, 34.89	negative
C	1	T1	2020-08-12	08:00:00	09:15:00	1	11	F	symptomatic	Positive	LC-480	15.89	negative
C	1	T1	2020-08-20	08:40:00	10:30:00	14	13	F	symptomatic	Positive	LC-480	18.22	negative
C	1	T1	2020-08-20	09:20:00	10:15:00	1	12	F	symptomatic	Positive	LC-480	14.95	negative
C	1	T1	2020-09-04	08:30:00	09:45:00	3	7	F	symptomatic	Positive	LC-480	34.33	negative
C	1	T2	2020-05-01	10:40:00	11:25:00	17	40	M	symptomatic	Positive	LC-480	23.45	not done
C	1	T2	2020-05-01	11:33:00	12:50:00	15	35	F	symptomatic	Positive	LC-480	15.93	not done
C	1	T2	2020-05-01	11:40:00	12:50:00	12	41	F	symptomatic	Positive	AusDx	25.93	not done
C	1	T2	2020-07-08	14:40:00	15:20:00	4	49	M	asymptomatic	Positive	LC-480		RSV B, rhino/entero
C	1	T2	2020-07-08	14:45:00	15:20:00	2	49	M	asymptomatic	Positive	LC-480	30.82	not done
C	1	T2	2020-07-17	13:50:00	14:45:00	2	38	M	symptomatic	Positive	LC-480		rhino/enterovirus
C	1	T2	2020-07-15	14:20:00	14:45:00	11	30	F	symptomatic	Positive	LC-480	33.13	rhino/entero
C	1	T2	2020-08-21	13:37:00	14:10:00	1	65	M	symptomatic	Positive	LC-480	30.37	rhino/entero
C	1	T2	2020-07-24	11:45:00	12:30:00	1	35	M	symptomatic	Positive	LC-480	35.68	rhino/entero, adenovirus
C	1	T2	2020-07-22	14:02:00	14:20:00	11	31	F	symptomatic	Positive	LC-480	32.19	negative
C	1	T2	2020-07-30	15:10:00	16:00:00	5	32	M	symptomatic	Positive	LC-480	35	negative
C	1	T2	2020-07-28	11:00:00	11:30:00	3	31	F	symptomatic	Positive	LC-480		negative
C	1	T2	2020-08-20	09:54:00	13:00:00	2	50	F	asymptomatic	Positive	LC-480	20.54	Enterovirus, Adenovirus
C	1	T2	2020-08-10	09:04:00	09:45:00	16	41	M	symptomatic	Positive	LC-480	30.83	Enterovirus, Adenovirus
C	1	T2	2020-08-14	12:12:00	12:40:00	4	32	M	symptomatic	Positive	LC-480	32.3	Adenovirus
C	1	T2	2020-07-29	15:27:00	16:05:00	2	28	F	symptomatic	Positive	LC-480		not done
C	1	T2	2020-09-10	13:17:00	14:20:00	3	43	M	symptomatic	Positive	LC-480	36	negative
C	1	T2	2020-09-10	10:22:00	12:30:00	1	40	F	symptomatic	Positive	LC-480	15.89	negative
C	1	T2	2020-09-15	10:46:00	11:50:00	14	39	F	symptomatic	Positive	LC-480	18.22	negative
C	1	T2	2020-09-28	11:30:00	12:00:00	3	31	F	symptomatic	Positive	LC-480	34.33	negative
C	0	T1	2020-05-10	11:00:00	11:40:00	12	0	M	asymptomatic	Negative			RSV A, rhino/entero
C	0	T1	2020-05-10	11:00:00	11:40:00	9	0	M	asymptomatic	Negative			negative
C	0	T1	2020-05-10	11:00:00	11:40:00	7	0	F	asymptomatic	Negative			negative
C	0	T1	2020-05-10	11:00:00	11:40:00	4	0	F	symptomatic	Negative			rhino/entero
C	0	T1	2020-06-18	09:20:00	11:25:00	17	0	F	asymptomatic	Negative			rhino/entero
C	0	T1	2020-06-18	08:45:00	11:25:00	15	0	F	asymptomatic	Negative			Rhino/entero, Enterovirus
C	0	T1	2020-07-31	08:45:00	10:30:00	3	12	F	symptomatic	Negative			negative
C	0	T2	2020-05-01	11:50:00	12:50:00	10		F	asymptomatic	Negative			not done
C	0	T2	2020-06-16	16:49:00	17:16:00	12	37	M	asymptomatic	Negative			RSV A, rhino/entero
C	0	T2	2020-06-16	16:43:00	17:16:00	9	37	M	asymptomatic	Negative			negative
C	0	T2	2020-06-16	17:00:00	17:16:00	7	37	F	asymptomatic	Negative			negative
C	0	T2	2020-06-16	16:37:00	17:16:00	4	37	F	symptomatic	Negative			rhino/entero
C	0	T2	2020-07-03	13:13:00	13:45:00	9	37	F	asymptomatic	Negative			negative
C	0	T2	2020-07-03	13:25:00	13:45:00	5	37	M	asymptomatic	Negative			rhino/entero
C	0	T2	2020-07-15	14:00:00	14:45:00	17	27	F	asymptomatic	Negative			rhino/entero
C	0	T2	2020-07-16	08:45:00	09:10:00	15	28	F	asymptomatic	Negative			Rhino/entero, Enterovirus
C	0	T2	2020-07-15	14:25:00	14:45:00	4	30	F	symptomatic	Negative			rhino/entero
C	0	T2	2020-08-10	09:16:00	09:45:00	12	40	M	asymptomatic	Negative			Enterovirus
C	0	T2	2020-08-14	11:37:00	12:40:00	2	32	M	asymptomatic	Negative			negative
C	0	T2	2020-09-01	10:05:00	11:25:00	3	44	F	symptomatic	Negative			negative
C	0	T2	2020-09-01	09:55:00	11:25:00	1	44	F	symptomatic	Negative			negative
C	0	T2	2020-07-29	15:39:00	16:05:00	5	31	F	symptomatic	Negative			not done
C	0	T2	2020-07-29	16:07:00	16:20:00	2	31	F	symptomatic	Negative			not done

## Sheet: Longitudinal Cohort
Adult or child	SARS-CoV-2	T1 or T2	Date of sample	Age at sample collection	Day of sample collection since first PCR test	Sex	symptomatic/ asymptomatic	SARS-CoV-2 swab	PCR platform	CT score at T1
A	1	T1	2020-05-12	42	4	F	symptomatic	Positive	LC-480	32.35
A	1	T1	2020-05-28	27	9	F	asymptomatic	Positive	-	-
A	1	T1	2020-07-08	35	9	F	symptomatic	Positive	-	-
A	1	T1	2020-07-15	62	16	M	symptomatic	Positive	LC-480	19.84
A	1	T1	2020-07-15	62	12	F	symptomatic	Positive	-	-
A	1	T1	2020-07-31	40	12	M	symptomatic	Positive	LC-480	26.75
A	1	T1	2020-08-12	36	14	M	symptomatic	Positive	-	-
A	1	T1	2020-08-12	35	11	F	symptomatic	Positive	LC-480	33.87
A	1	T1	2020-08-20	51	13	M	symptomatic	Positive	-	-
A	1	T1	2020-08-20	32	18	M	symptomatic	Positive	-	-
A	1	T2	2020-06-03	42	26	F	symptomatic	Positive	LC-480	32.35
A	1	T2	2020-07-08	27	50	F	asymptomatic	Positive	-
A	1	T2	2020-08-20	36	52	F	symptomatic	Positive	-	-
A	1	T2	2020-07-31	62	32	M	symptomatic	Positive	LC-480	19.84
A	1	T2	2020-07-31	62	28	F	symptomatic	Positive	-	-
A	1	T2	2020-09-01	40	44	M	symptomatic	Positive	LC-480	26.75
A	1	T2	2020-09-10	36	43	M	symptomatic	Positive	-	-
A	1	T2	2020-09-10	35	40	F	symptomatic	Positive	LC-480	33.87
A	1	T2	2020-09-15	51	39	M	symptomatic	Positive	-	-
A	1	T2	2020-09-22	32	51	M	symptomatic	Positive	-	-
A	0	T1	2020-05-10	43	0	M	asymptomatic	Negative
A	0	T1	2020-06-12	42	1	M	asymptomatic	Negative
A	0	T1	2020-06-12	41	1	F	asymptomatic	Negative
A	0	T1	2020-06-18	46	0	M	asymptomatic	Negative
A	0	T1	2020-06-18	41	0	F	asymptomatic	Negative
A	0	T1	2020-06-25	38	8	F	symptomatic	Negative
A	0	T1	2020-06-26	37	9	M	symptomatic	Negative
A	0	T1	2020-06-28	37	3	F	asymptomatic	Negative
A	0	T1	2020-07-01	50	10	F	symptomatic	Negative
A	0	T1	2020-07-16	38	0	M	asymptomatic	Negative
A	0	T1	2020-07-16	37	3	F	symptomatic	Negative
A	0	T1	2020-07-31	39	12	F	symptomatic	Negative
A	0	T1	2020-08-20	52	13	F	symptomatic	Negative
A	0	T1	2020-08-20	25	13	M	symptomatic	Negative
A	0	T1	2020-08-20	26	15	F	asymptomatic	Negative
A	0	T1	2020-09-04	38	7	F	symptomatic	Negative
A	0	T2	2020-06-16	43	37	M	asymptomatic	Negative
A	0	T2	2020-07-15	42	34	M	asymptomatic	Negative
A	0	T2	2020-07-16	42	35	F	asymptomatic	Negative
A	0	T2	2020-07-16	46	28	M	asymptomatic	Negative
A	0	T2	2020-07-15	41	27	F	asymptomatic	Negative
A	0	T2	2020-08-21	38	65	F	symptomatic	Negative
A	0	T2	2020-08-21	37	65	M	symptomatic	Negative
A	0	T2	2020-07-24	38	29	F	asymptomatic	Negative
A	0	T2	2020-07-22	50	31	F	symptomatic	Negative
A	0	T2	2020-08-14	38	29	M	asymptomatic	Negative
A	0	T2	2020-08-14	37	32	F	symptomatic	Negative
A	0	T2	2020-09-01	39	44	F	symptomatic	Negative
A	0	T2	2020-09-15	52	39	F	symptomatic	Negative
A	0	T2	2020-09-15	26	39	M	symptomatic	Negative
A	0	T2	2020-09-22	26	48	F	asymptomatic	Negative
A	0	T2	2020-09-28	38	31	F	symptomatic	Negative
C	1	T1	2020-06-12	2	3	M	symptomatic	Positive	LC-480
C	1	T1	2020-06-18	10	3	F	symptomatic	Positive	LC-480	33.13
C	1	T1	2020-06-27	1	10	M	symptomatic	Positive	LC-480	30.37
C	1	T1	2020-07-01	11	10	F	symptomatic	Positive	LC-480	32.19
C	1	T1	2020-07-08	2	7	F	asymptomatic	Positive	LC-480	20.54
C	1	T1	2020-08-12	1	11	F	symptomatic	Positive	LC-480	15.89
C	1	T1	2020-08-20	14	13	F	symptomatic	Positive	LC-480	18.22
C	1	T1	2020-09-04	3	7	F	symptomatic	Positive	LC-480	34.33
C	1	T2	2020-07-17	2	38	M	symptomatic	Positive	LC-480
C	1	T2	2020-07-15	11	30	F	symptomatic	Positive	LC-480	33.13
C	1	T2	2020-08-21	1	65	M	symptomatic	Positive	LC-480	30.37
C	1	T2	2020-07-22	11	31	F	symptomatic	Positive	LC-480	32.19
C	1	T2	2020-08-20	2	50	F	asymptomatic	Positive	LC-480	20.54
C	1	T2	2020-09-10	1	40	F	symptomatic	Positive	LC-480	15.89
C	1	T2	2020-09-15	14	39	F	symptomatic	Positive	LC-480	18.22
C	1	T2	2020-09-28	3	31	F	symptomatic	Positive	LC-480	34.33
C	0	T1	2020-05-10	12	0	M	asymptomatic	Negative
C	0	T1	2020-05-10	9	0	M	asymptomatic	Negative
C	0	T1	2020-05-10	7	0	F	asymptomatic	Negative
C	0	T1	2020-05-10	4	0	F	symptomatic	Negative
C	0	T1	2020-06-18	17	0	F	asymptomatic	Negative
C	0	T1	2020-06-18	15	0	F	asymptomatic	Negative
C	0	T1	2020-07-31	3	12	F	symptomatic	Negative
C	0	T2	2020-06-16	12	37	M	asymptomatic	Negative
C	0	T2	2020-06-16	9	37	M	asymptomatic	Negative
C	0	T2	2020-06-16	7	37	F	asymptomatic	Negative
C	0	T2	2020-06-16	4	37	F	symptomatic	Negative
C	0	T2	2020-07-15	17	27	F	asymptomatic	Negative
C	0	T2	2020-07-16	15	28	F	asymptomatic	Negative
C	0	T2	2020-09-01	3	44	F	symptomatic	Negative

## Sheet: Serology (exposed)
Adult or Child	SARS-CoV-2	T1 or T2	Date of sample	RBD/S1 IgG
A	0	T1	2020-05-10	Positive
A	0	T1	2020-06-11	Negative
A	0	T1	2020-06-11	Negative
A	0	T1	2020-06-18	Negative
A	0	T1	2020-06-18	Negative
A	0	T1	2020-06-25	Negative
A	0	T1	2020-06-25	Negative
A	0	T1	2020-06-25	Negative
A	0	T1	2020-07-01	Negative
A	0	T1	2020-07-17	Negative
A	0	T1	2020-07-17	Negative
A	0	T1	2020-07-16	Negative
A	0	T1	2020-07-16	Negative
A	0	T1	2020-07-23	Negative
A	0	T1	2020-07-24	Negative
A	0	T1	2020-07-24	Negative
A	0	T1	2020-07-31	Negative
A	0	T1	2020-08-20	Negative
A	0	T1	2020-08-20	Negative
A	0	T1	2020-08-20	Positive
A	0	T1	2020-08-21	Negative
A	0	T1	2020-08-21	Negative
A	0	T1	2020-08-21	Negative
A	0	T1	2020-09-04	Negative
A	0	T2	2020-05-01	Negative
A	0	T2	2020-05-01	Negative
A	0	T2	2020-05-01	Negative
A	0	T2	2020-06-16	Positive
A	0	T2	2020-07-03	Negative
A	0	T2	2020-07-15	Negative
A	0	T2	2020-07-16	Negative
A	0	T2	2020-07-16	Negative
A	0	T2	2020-07-15	Negative
A	0	T2	2020-08-21	Negative
A	0	T2	2020-08-21	Negative
A	0	T2	2020-07-24	Negative
A	0	T2	2020-07-24	Negative
A	0	T2	2020-07-22	Negative
A	0	T2	2020-07-30	Negative
A	0	T2	2020-07-30	Negative
A	0	T2	2020-07-28	Negative
A	0	T2	2020-07-28	Negative
A	0	T2	2020-08-10	Negative
A	0	T2	2020-08-10	Negative
A	0	T2	2020-08-14	Negative
A	0	T2	2020-08-14	Negative
A	0	T2	2020-09-01	Negative
A	0	T2	2020-07-29	Negative
A	0	T2	2020-07-29	Negative
A	0	T2	2020-07-29	Negative
A	0	T2	2020-09-10	Positive
A	0	T2	2020-09-10	Negative
A	0	T2	2020-09-15	Negative
A	0	T2	2020-09-15	Negative
A	0	T2	2020-09-22	Positive
A	0	T2	2020-09-28	Negative
C	0	T1	2020-05-10	Negative
C	0	T1	2020-05-10	Negative
C	0	T1	2020-05-10	Negative
C	0	T1	2020-05-10	Negative
C	0	T1	2020-06-18	Negative
C	0	T1	2020-06-18	Negative
C	0	T1	2020-07-31	Negative
C	0	T2	2020-05-01	Negative
C	0	T2	2020-06-16	Negative
C	0	T2	2020-06-16	Negative
C	0	T2	2020-06-16	Negative
C	0	T2	2020-06-16	Negative
C	0	T2	2020-07-03	Negative
C	0	T2	2020-07-03	Negative
C	0	T2	2020-07-15	Negative
C	0	T2	2020-07-16	Negative
C	0	T2	2020-07-15	Negative
C	0	T2	2020-08-10	Negative
C	0	T2	2020-08-14	Negative
C	0	T2	2020-09-01	Negative
C	0	T2	2020-09-01	Negative
C	0	T2	2020-07-29	Negative
C	0	T2	2020-07-29	Negative

## Sheet: P-values (for table 1)
Age at sampling	P-value by Mann-Whitney U Test
Positive adults (acute vs follow up)	p=0.55
Exposed adults (acute vs follow up)	p=0.24
Positive children (acute vs follow up)	p=0.18
Exposed children (acute vs follow up)	p=0.37
Positive adults (acute) vs exposed adults (acute)	p=0.28
Positive adults (follow up) vs exposed adults (follow up)	p=0.31
Positive children (acute) vs exposed children (acute)	p=0.02
Positive children (follow up) vs exposed children (follow up)	p=0.39
Sex (% Male)	P-value by Z-score Test
Positive adults (acute vs follow up)	p=0.46
Exposed adults (acute vs follow up)	p=0.53
Positive children (acute vs follow up)	p=0.35
Exposed children (acute vs follow up)	p=0.89
Positive adults (acute) vs exposed adults (acute)	p=0.47
Positive adults (follow up) vs exposed adults (follow up)	p=0.52
Positive children (acute) vs exposed children (acute)	p=0.82
Positive children (follow up) vs exposed children (follow up)	p=0.25
% Symptomatic	P-value by Z-score Test
Positive adults (acute vs follow up)	p=0.54
Exposed adults (acute vs follow up)	p=0.24
Positive children (acute vs follow up)	p=0.58
Exposed children (acute vs follow up)	p=0.68
Positive adults (acute) vs exposed adults (acute)	p=0.002
Positive adults (follow up) vs exposed adults (follow up)	p=0.006
Positive children (acute) vs exposed children (acute)	p=0.004
Positive children (follow up) vs exposed children (follow up)	p=0.003

## Sheet: Single sample analysis
	SARS-CoV-2 positive adults: acute (n=15)	SARS-CoV-2 positive adults: follow up (n=5)	SARS-CoV-2 exposed adults: acute (n=24)	SARS-CoV-2 exposed adults: follow up (n=16)
MEDIAN
Monocytes	2.479	7.655	3.687	3.881
Classical monocytes	1.808	6.235	2.76	2.874
Intermediate monocytes	0.186	0.432	0.229	0.238
Non-classical monocytes	0.445	0.878	0.641	0.862
Dendritic cells	0.368	0.354	0.366	0.447
LD neutrophils	0.413	2.54	0.306	1.023
CD8 TCM	7.128	12.58	8.818	9.99
CD4 TCM	27.67	39.74	26.33	30.25
	SARS-CoV-2 positive children: acute (n=12)	SARS-CoV-2 positive children: follow up (n=12)	SARS-CoV-2 exposed children: acute (n=7)	SARS-CoV-2 exposed children: follow up (n=9)
MEDIAN
Monocytes	1.042	2.655	1.441	2.571
Classical monocytes	0.889	1.964	1.154	2.036
Intermediate monocytes	0.04	0.149	0.067	0.137
Non-classical monocytes	0.091	0.5252	0.187	0.354
Dendritic cells	0.237	0.395	0.308	0.397
LD neutrophils	0.286	0.503	0.072	1.034
CD8 TCM	3.383	8.884	3.761	7.385
CD4 TCM	12.06	20.22	15	20.14
